# Supplementary material for: Hierarchically Developed Ni(OH)2@MgCo2O4 Nanosheet Composites for Boosting Supercapacitor Performance
Source: MDPI journal article supplement (doi:10.3390/nano13081414), 2023-04-19
Supplement: s1 [file s1]

# Hierarchically Developed Ni(OH)<sub>2</sub>@MgCo<sub>2</sub>O<sub>4</sub> Nanosheet Composites for Boosting Supercapacitor Performance

Hammad Mueen Arbi <sup>1,†</sup>, Ganesh Koyyada <sup>2,†</sup>, Yedluri Anil Kumar <sup>3,4</sup>, Dasha Kumar Kulurumotlakatla <sup>5</sup>, Jae Hong Kim <sup>2</sup>, Md Moniruzzaman <sup>6,\*</sup>, Salem Alzahmi <sup>3,4,\*</sup> and Ihab M. Obaidat <sup>1,4,\*</sup>

<sup>1</sup> Department of Physics, United Arab Emirates University, Al Ain P.O. Box 15551, United Arab Emirates

<sup>2</sup> Department of Chemical Engineering, Yeungnam University, 214-1, Daehak-ro 280, Gyeongsan 712-749, Republic of Korea

<sup>3</sup> Department of Chemical & Petroleum Engineering, United Arab Emirates University, Al Ain P.O. Box 15551, United Arab Emirates

<sup>4</sup> National Water and Energy Center, United Arab Emirates University, Al Ain P.O. Box 15551, United Arab Emirates

<sup>5</sup> Graduate School of Convergence Science, Pusan National University, San 30 Jangjeon-dong, Geumjeong-gu, Busan 609-735, Republic of Korea

<sup>6</sup> Department of Chemical and Biological Engineering, Gachon University, 1342 Seongnam-daero, Seongnam-si 13120, Republic of Korea

\* Correspondence: mani57chem@gachon.ac.kr (M.M.); s.alzahmi@uaeu.ac.ae (S.A.); iobaidat@uaeu.ac.ae (I.M.O.)

† These authors contributed equally to this work.

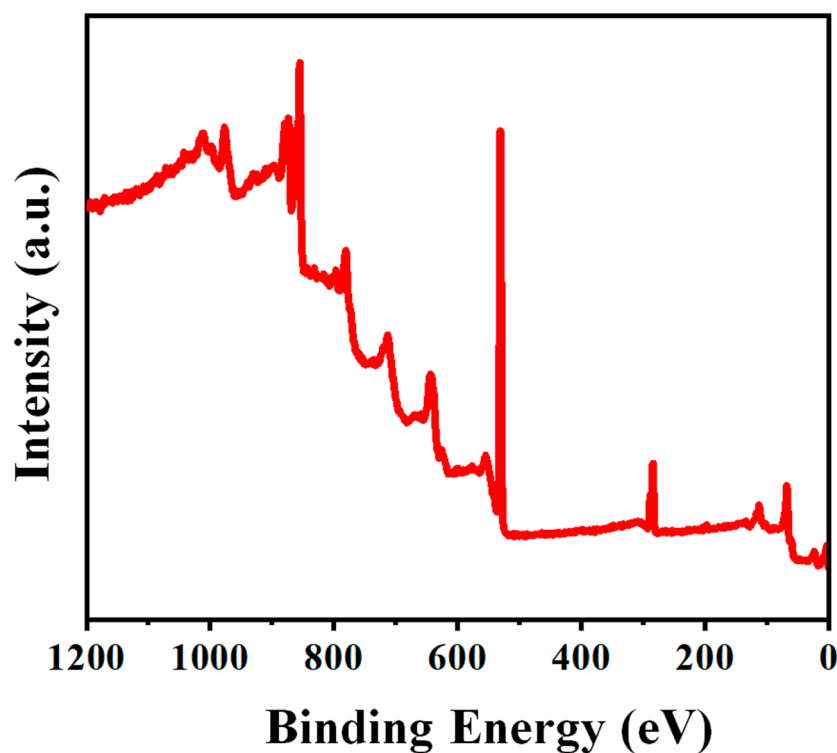

Figure S1. XPS full spectra of MgCo<sub>2</sub>O<sub>4</sub> nanoflakes grown on Ni foam.
